# Supplementary material for: Plasma metabolomics identifies lipid abnormalities linked to markers of inflammation, microbial translocation, and hepatic function in HIV patients receiving protease inhibitors
Source: BMC Infect Dis. 2013 May 4;13:203. doi: 10.1186/1471-2334-13-203 (PMC3655873; doi:10.1186/1471-2334-13-203)
Supplement: Additional file 3 — Sub-analysis of HIV plasma metabolome according to HCV serostatus. Analysis was performed on a subset of HIV subjects with (n=10) and without HCV co-infection (n=7) matched for age, gender, and race/ethnicity. Shown is the total dataset of 227 metabolites detected in the initial and validation cohorts following data pre-processing. Significantly altered metabolites were defined by a FC >1.3, p-value ≤0.1 and FDR ≤0.1 compared to healthy controls (n=8) matched for age, gender, and race/ethnicity. [file 1471-2334-13-203-S3.xls]

## Sheet: Sheet1
Additional file 3. Sub-analysis of HIV plasma metabolome according to HCV serostatus. Analysis was performed on a subset of HIV subjects with (n=10) and without HCV co-infection (n=7) matched for age, gender, and race/ethnicity. Shown is the total dataset of 227 metabolites detected in the initial and validation cohorts following data pre-processing. Significantly altered metabolites were defined…
	HCVneg vs. Cont			HCVpos vs. Cont			HCVpos vs.HCVneg
METABOLITE	FC	p-value	FDR	FC	p-value	FDR	FC	p-value	FDR
1,11-undecanedicarboxylate	1.61	0.03	0.12	1.45	0.094	0.106	-1.11	0.453	0.658
10-heptadecenoate (17:1n7)	-2.12	0.013	0.083	-2.58	0.004	0.022	-1.22	0.254	0.543
10-nonadecenoate (19:1n9)	-1.96	0.043	0.134	-2.63	0.011	0.032	-1.34	0.164	0.54
10-undecenoate (11:1n1)	-1.66	0.136	0.22	-2.18	0.058	0.082	-1.32	0.488	0.674
1-arachidonoylglycerophosphoethanolamine*	-1.08	0.725	0.549	-1.42	0.199	0.161	-1.32	0.186	0.541
1-arachidonoylglycerophosphoinositol*	-1.37	0.229	0.283	-1.67	0.156	0.141	-1.22	0.575	0.709
1-arachidoylglycerophosphocholine	-1.46	0.182	0.25	-1.67	0.131	0.128	-1.15	0.63	0.728
1-docosahexaenoylglycerophosphocholine*	-1.18	0.549	0.48	-1.81	0.029	0.056	-1.53	0.134	0.538
1-docosapentaenoylglycerophosphocholine*	-1.77	0.103	0.191	-2.16	0.033	0.06	-1.22	0.286	0.554
1-eicosadienoylglycerophosphocholine*	-1.05	0.797	0.572	-1.07	0.824	0.397	-1.01	0.961	0.803
1-heptadecanoylglycerophosphocholine	-1.71	0.018	0.097	-1.58	0.078	0.097	1.08	0.764	0.764
1-linoleoylglycerophosphocholine	-1.22	0.17	0.242	-1.73	0.017	0.038	-1.42	0.11	0.535
1-linoleoylglycerophosphoethanolamine*	1.74	0.07	0.157	1.11	0.747	0.374	-1.57	0.149	0.539
1-myristoylglycerophosphocholine	-1.48	0.129	0.214	-2.11	0.043	0.07	-1.42	0.267	0.543
1-oleoylglycerophosphocholine	-1.09	0.509	0.461	-1.02	0.938	0.428	1.07	0.76	0.764
1-oleoylglycerophosphoethanolamine	1.82	0.053	0.144	1.15	0.625	0.333	-1.58	0.03	0.502
1-palmitoleoylglycerophosphocholine*	-1.39	0.18	0.249	-1.66	0.055	0.08	-1.2	0.506	0.682
1-palmitoylglycerophosphocholine	-1.08	0.259	0.303	-1.1	0.569	0.313	-1.01	0.941	0.8
1-palmitoylglycerophosphoethanolamine	1.31	0.217	0.274	-1.01	0.977	0.438	-1.31	0.137	0.538
1-palmitoylplasmenylethanolamine*	-1.12	0.795	0.572	-2.11	0.158	0.142	-1.89	0.197	0.541
1-pentadecanoylglycerophosphocholine*	-1.43	0.171	0.243	-1.44	0.115	0.118	-1.01	0.963	0.804
1-stearoylglycerophosphocholine	-1.32	0.265	0.308	-1.28	0.476	0.275	1.03	0.936	0.799
1-stearoylglycerophosphoethanolamine	1.06	0.83	0.582	-1.3	0.298	0.201	-1.37	0.214	0.542
21-hydroxypregnenolone disulfate	-1.3	0.247	0.295	-1.94	0.032	0.06	-1.49	0.088	0.532
2-aminobutyrate	-1.11	0.558	0.484	-1.36	0.184	0.154	-1.23	0.236	0.543
2-arachidonoylglycerophosphocholine*	-1.13	0.677	0.532	-1.19	0.592	0.321	-1.06	0.805	0.774
2-arachidonoylglycerophosphoethanolamine*	1.04	0.894	0.6	-1.28	0.504	0.287	-1.33	0.287	0.555
2-hydroxy-3-methylvalerate	-1.21	0.449	0.43	-1.09	0.792	0.388	1.11	0.724	0.755
2-hydroxybutyrate (AHB)	-1.27	0.374	0.386	-1.93	0.086	0.101	-1.52	0.199	0.541
2-hydroxyoctanoate	1.65	0.137	0.221	1.36	0.308	0.205	-1.21	0.58	0.711
2-hydroxypalmitate	-1.58	0.005	0.05	-1.58	0.072	0.092	-1	0.996	0.809
2-hydroxystearate	-1.52	0.033	0.123	-1.74	0.087	0.102	-1.14	0.652	0.735
2-linoleoylglycerophosphocholine*	-1.12	0.485	0.449	-1.67	0.074	0.094	-1.49	0.151	0.539
2-linoleoylglycerophosphoethanolamine*	1.61	0.031	0.121	1.03	0.901	0.419	-1.56	0.123	0.537
2-methylbutyrylcarnitine (C5)	-1.11	0.606	0.504	-1.28	0.216	0.167	-1.16	0.449	0.656
2-myristoylglycerophosphocholine*	1.14	0.651	0.522	-1.45	0.313	0.206	-1.65	0.073	0.529
2-oleoylglycerophosphocholine*	-1.35	0.02	0.103	-1.53	0.063	0.086	-1.13	0.543	0.698
2-oleoylglycerophosphoethanolamine*	1.52	0.191	0.257	1.24	0.419	0.251	-1.22	0.467	0.665
2-palmitoylglycerophosphocholine*	-1.86	0.002	0.034	-2.16	0.013	0.034	-1.16	0.579	0.711
2-palmitoylglycerophosphoethanolamine*	1.58	0.129	0.215	1.11	0.753	0.376	-1.43	0.2	0.541
2-stearoylglycerophosphocholine*	-1.25	0.381	0.39	-1.85	0.129	0.127	-1.48	0.272	0.543
3-(4-hydroxyphenyl)lactate	1.14	0.519	0.465	1.07	0.762	0.378	-1.07	0.801	0.773
3-dehydrocarnitine*	-1.01	0.979	0.622	1.29	0.288	0.197	1.3	0.336	0.588
3-hydroxybutyrate (BHBA)	-1.42	0.433	0.421	-2.62	0.049	0.076	-1.84	0.023	0.488
3-hydroxyisobutyrate	-1.05	0.823	0.58	-1.21	0.465	0.271	-1.15	0.449	0.656
3-indoxyl sulfate	1.15	0.621	0.51	1.22	0.541	0.302	1.07	0.857	0.784
3-methoxytyrosine	2.11	0.013	0.083	2.17	0.012	0.033	1.03	0.854	0.784
3-methylglutarylcarnitine (C6)	1.15	0.675	0.531	-1.03	0.915	0.422	-1.19	0.624	0.726
3-methylhistidine	-1.38	0.51	0.461	-1.2	0.739	0.371	1.14	0.764	0.764
3-phenylpropionate (hydrocinnamate)	-1.38	0.344	0.366	-1.48	0.239	0.177	-1.08	0.826	0.778
4-acetamidobutanoate	1.01	0.963	0.618	1.09	0.685	0.354	1.08	0.642	0.732
4-androsten-3beta,17beta-diol disulfate 1*	-1.77	0.176	0.247	-2.35	0.189	0.157	-1.33	0.609	0.721
4-androsten-3beta,17beta-diol disulfate 2*	-1.2	0.365	0.38	-1.8	0.188	0.156	-1.5	0.322	0.579
5alpha-androstan-3beta,17beta-diol disulfate	-1.96	0.201	0.262	-2.89	0.103	0.111	-1.48	0.454	0.658
5alpha-pregnan-3beta,20alpha-diol disulfate	-1.5	0.16	0.237	-1.51	0.169	0.148	-1	0.991	0.808
5-HETE	-4.22	0.041	0.133	-12.6	0.003	0.019	-2.99	0.201	0.541
5-methyluridine (ribothymidine)	-1.37	0.156	0.234	-1.53	0.062	0.085	-1.12	0.372	0.612
5-oxoproline	-1.38	0.345	0.367	-1.54	0.185	0.155	-1.12	0.686	0.745
ADpSGEGDFXAEGGGVR*	-4.57	0.05	0.142	-8.44	0.009	0.031	-1.85	0.235	0.543
adrenate (22:4n6)	-1.41	0.269	0.311	-1.8	0.099	0.109	-1.28	0.498	0.679
ADSGEGDFXAEGGGVR*	-8.33	0.002	0.037	-16.29	0.002	0.013	-1.95	0.36	0.605
alanine	-1.09	0.621	0.511	-1.25	0.179	0.152	-1.14	0.405	0.632
alpha-hydroxyisovalerate	-1.5	0.205	0.265	-1.73	0.138	0.132	-1.15	0.685	0.744
androsterone sulfate	-1.49	0.357	0.375	-2.19	0.094	0.106	-1.47	0.406	0.633
arachidonate (20:4n6)	-1.36	0.065	0.154	-1.98	0.03	0.058	-1.46	0.189	0.541
arginine	-1.87	0.039	0.13	-2.72	0.012	0.033	-1.45	0.257	0.543
asparagine	2.91	0.028	0.116	2.42	0.101	0.11	-1.2	0.661	0.738
asparagylleucine	-1.24	0.645	0.52	-1.81	0.107	0.113	-1.45	0.404	0.632
aspartate	-1.25	0.378	0.388	-1.53	0.1	0.11	-1.23	0.334	0.586
beta-alanine	-1.55	0.135	0.219	-1.75	0.05	0.076	-1.13	0.571	0.708
beta-hydroxyisovalerate	-1.02	0.899	0.602	-1.14	0.58	0.317	-1.11	0.668	0.739
beta-hydroxypyruvate	1.46	0.135	0.219	1.2	0.257	0.185	-1.22	0.427	0.645
betaine	1.06	0.633	0.515	-1.11	0.391	0.24	-1.17	0.214	0.542
bilirubin (Z,Z)	1.34	0.532	0.472	1.57	0.318	0.208	1.17	0.788	0.77
biliverdin	-1.29	0.468	0.44	-1.73	0.146	0.136	-1.33	0.421	0.641
bradykinin	-13.32	0.001	0.031	-8.71	0.001	0.008	1.53	0.529	0.692
bradykinin, hydroxy-pro(3)	-3.62	0.003	0.043	-1.32	0.547	0.304	2.73	0.04	0.513
butyrylcarnitine	1	0.994	0.625	1.31	0.252	0.183	1.31	0.205	0.542
caprate (10:0)	-1.13	0.546	0.478	-1.23	0.275	0.192	-1.09	0.654	0.735
caprylate (8:0)	1.17	0.604	0.504	-1.21	0.317	0.208	-1.42	0.282	0.551
carnitine	-1.48	0.001	0.002	-1.43	0.002	0.016	1.03	0.73	0.756
C-glycosyltryptophan*	1.28	0.361	0.377	1.33	0.2	0.161	1.03	0.885	0.79
cholate	-2.08	0.13	0.216	-2.59	0.051	0.077	-1.24	0.456	0.659
cholesterol	-1.01	0.93	0.61	-1.12	0.47	0.273	-1.11	0.469	0.666
choline	1.06	0.577	0.492	1.18	0.181	0.153	1.11	0.209	0.542
cis-4-decenoyl carnitine	-1.41	0.248	0.296	-2.18	0.03	0.058	-1.55	0.142	0.538
cis-vaccenate (18:1n7)	-1.28	0.345	0.367	-2.36	0.015	0.036	-1.84	0.068	0.527
citrate	1.67	0.43	0.419	-1.28	0.209	0.165	-2.13	0.261	0.543
citrulline	1.08	0.772	0.564	-1.53	0.177	0.152	-1.64	0.101	0.534
cortisol	1.25	0.391	0.396	-1.01	0.972	0.437	-1.26	0.466	0.665
cortisone	-1.2	0.234	0.286	-1.27	0.185	0.155	-1.06	0.706	0.75
creatine	-1.66	0.143	0.225	-1.9	0.059	0.083	-1.15	0.587	0.714
creatinine	-1.03	0.692	0.538	-1.04	0.591	0.321	-1.01	0.938	0.799
cyclo(leu-pro)	-1.22	0.71	0.544	-1.5	0.329	0.212	-1.23	0.626	0.727
cysteine	1.26	0.281	0.32	1.3	0.309	0.205	1.03	0.909	0.794
decanoylcarnitine	-1.48	0.245	0.294	-2.14	0.062	0.085	-1.45	0.242	0.543
dehydroisoandrosterone sulfate (DHEA-S)	-1.98	0.026	0.113	-4.16	0.009	0.031	-2.1	0.143	0.538
deoxycarnitine	-1.33	0.074	0.16	-1.3	0.052	0.078	1.02	0.872	0.788
dihomo-linoleate (20:2n6)	-2.04	0.009	0.068	-3.37	0.001	0.008	-1.65	0.102	0.534
dihomo-linolenate (20:3n3 or n6)	-1.23	0.278	0.318	-1.75	0.088	0.103	-1.43	0.259	0.543
dimethylglycine	1.07	0.784	0.568	1.17	0.432	0.256	1.1	0.721	0.754
docosadienoate (22:2n6)	-1.67	0.082	0.169	-2.16	0.072	0.093	-1.29	0.487	0.674
docosahexaenoate (DHA; 22:6n3)	-1.29	0.317	0.347	-1.93	0.042	0.069	-1.5	0.184	0.541
docosapentaenoate (n3 DPA; 22:5n3)	-2.47	0.003	0.043	-3.56	0.001	0.009	-1.44	0.157	0.539
docosapentaenoate (n6 DPA; 22:5n6)	1.15	0.785	0.569	-1.14	0.821	0.396	-1.31	0.451	0.657
DSGEGDFXAEGGGVR*	-3.14	0.072	0.159	-5.19	0.026	0.053	-1.65	0.375	0.615
D-urobilin	1.98	0.138	0.222	1.3	0.611	0.328	-1.53	0.416	0.639
eicosapentaenoate (EPA; 20:5n3)	-1.85	0.062	0.152	-2.45	0.017	0.038	-1.32	0.196	0.541
eicosenoate (20:1n9 or 11)	-1.6	0.083	0.171	-2.78	0.008	0.029	-1.73	0.086	0.532
epiandrosterone sulfate	-1.77	0.165	0.24	-3.85	0.015	0.036	-2.17	0.172	0.54
fumarate	1.38	0.035	0.125	1.23	0.315	0.207	-1.12	0.563	0.705
gamma-CEHC	1.13	0.698	0.539	-1.35	0.348	0.221	-1.52	0.138	0.538
gamma-glutamylleucine	-1.71	0.153	0.232	-1.59	0.27	0.19	1.08	0.832	0.78
gamma-glutamylphenylalanine	-1.46	0.257	0.301	-1.36	0.266	0.189	1.07	0.842	0.781
gamma-glutamyltyrosine	-1.21	0.538	0.475	-1.07	0.798	0.389	1.13	0.647	0.733
gamma-glutamylvaline	-1.61	0.111	0.199	-1.26	0.559	0.309	1.28	0.513	0.685
gamma-tocopherol	-1.13	0.801	0.574	-1.1	0.789	0.387	1.03	0.95	0.801
glutarylcarnitine (C5)	-1.36	0.154	0.233	-1.37	0.126	0.125	-1.01	0.975	0.805
glycerol 3-phosphate (G3P)	-1.92	0.049	0.141	-3.35	0.007	0.029	-1.74	0.16	0.54
glycerophosphorylcholine (GPC)	-1.59	0.105	0.193	-3.3	0.036	0.064	-2.08	0.152	0.539
glycine	-1.15	0.458	0.435	-1.26	0.194	0.159	-1.1	0.505	0.682
glycochenodeoxycholate	2.13	0.27	0.312	1.73	0.43	0.256	-1.23	0.714	0.752
glycocholate	5.1	0.011	0.078	6.2	0.005	0.026	1.22	0.604	0.719
glycocholenate sulfate*	1.33	0.385	0.392	-1.44	0.154	0.141	-1.91	0.072	0.528
glycodeoxycholate	4.68	0.016	0.092	4.99	0.001	0.002	1.07	0.904	0.793
glycolithocholate sulfate*	1.82	0.17	0.243	-1.16	0.778	0.383	-2.11	0.085	0.531
heme	2.78	0.041	0.132	2.55	0.075	0.095	-1.09	0.875	0.788
heptanoate (7:0)	1.01	0.959	0.617	-1.14	0.53	0.298	-1.16	0.582	0.712
hexadecanedioate	-1.35	0.533	0.472	-1.3	0.585	0.319	1.04	0.901	0.793
hexanoylcarnitine	-1.24	0.404	0.404	-1.26	0.403	0.245	-1.01	0.962	0.803
histidylphenylalanine	-2.37	0.035	0.125	-2.7	0.019	0.043	-1.14	0.238	0.543
histidyltryptophan	6.01	0.009	0.068	1.52	0.428	0.255	-3.95	0.046	0.517
HWESASLLR	-2.28	0.094	0.182	-1.76	0.405	0.246	1.3	0.725	0.755
HWESASXX*	1.05	0.914	0.605	-1.32	0.607	0.327	-1.4	0.578	0.711
hypoxanthine	3.24	0.024	0.11	1.67	0.258	0.185	-1.94	0.075	0.529
indoleacetate	1.27	0.384	0.392	1.35	0.487	0.28	1.06	0.893	0.791
indolelactate	-1.19	0.453	0.432	-1.3	0.142	0.134	-1.09	0.736	0.758
indolepropionate	-2.31	0.05	0.142	-3.05	0.005	0.025	-1.32	0.454	0.658
inosine	1.63	0.488	0.45	-1.37	0.381	0.236	-2.24	0.223	0.542
isobutyrylcarnitine	-1.39	0.198	0.261	-1.03	0.908	0.421	1.34	0.378	0.616
isoleucine	-1	0.971	0.62	-1.14	0.291	0.199	-1.14	0.233	0.542
isoleucylthreonine	1.04	0.941	0.613	-2.8	0.081	0.099	-2.92	0.104	0.535
isovalerylcarnitine	-1.34	0.139	0.222	-1.61	0.065	0.087	-1.2	0.495	0.678
kynurenine	1.77	0.027	0.115	1.72	0.013	0.034	-1.03	0.895	0.792
laurate (12:0)	-1.21	0.188	0.254	-1.47	0.017	0.039	-1.21	0.111	0.535
laurylcarnitine	-1.15	0.758	0.56	-1.31	0.581	0.317	-1.15	0.7	0.748
leucine	-1.08	0.578	0.493	-1.32	0.072	0.093	-1.23	0.17	0.54
leucylglutamate	3.52	0.042	0.134	1.71	0.088	0.103	-2.05	0.225	0.542
leucylglycine	1.09	0.873	0.594	-1.52	0.351	0.223	-1.66	0.358	0.603
leucylleucine	1.03	0.955	0.616	-3.1	0.05	0.076	-3.2	0.023	0.49
leucylserine	-1.93	0.106	0.195	-1.56	0.22	0.169	1.24	0.558	0.703
levulinate (4-oxovalerate)	1.24	0.428	0.418	1.2	0.444	0.262	-1.04	0.892	0.791
linoleate (18:2n6)	-1.53	0.006	0.055	-2.45	0.001	0.004	-1.6	0.02	0.481
linolenate [alpha or gamma; (18:3n3 or 6)]	-2.25	0.001	0.03	-3.82	0.001	0.002	-1.69	0.019	0.479
L-urobilin	1.1	0.755	0.559	2.41	0.138	0.132	2.19	0.192	0.541
lysine	-1.58	0.024	0.11	-1.88	0.001	0.006	-1.18	0.384	0.62
malate	2.66	0.004	0.047	1.83	0.117	0.119	-1.45	0.333	0.586
margarate (17:0)	-1.71	0.011	0.077	-2.64	0.001	0.006	-1.55	0.031	0.503
methionylalanine	-4.73	0.006	0.057	-4.12	0.004	0.024	1.15	0.8	0.773
myristate (14:0)	-1.74	0.029	0.118	-1.99	0.011	0.032	-1.15	0.197	0.541
myristoleate (14:1n5)	-2.17	0.065	0.154	-2.31	0.053	0.078	-1.07	0.692	0.746
N1-methyladenosine	1.36	0.252	0.299	1.46	0.217	0.168	1.08	0.814	0.776
N6-carbamoylthreonyladenosine	-1.02	0.938	0.612	1.15	0.549	0.305	1.18	0.583	0.712
N-acetylalanine	-1.12	0.552	0.481	1.08	0.672	0.349	1.21	0.25	0.543
N-acetylglycine	-1.49	0.148	0.229	-1.79	0.036	0.063	-1.2	0.334	0.587
N-acetylmethionine	1.29	0.473	0.443	1.09	0.805	0.391	-1.18	0.584	0.713
N-acetylphenylalanine	-1.04	0.861	0.591	1.22	0.196	0.16	1.27	0.306	0.568
N-acetylserine	1.15	0.524	0.468	1.54	0.041	0.069	1.34	0.175	0.54
N-acetylthreonine	1.05	0.863	0.592	1.2	0.464	0.27	1.15	0.508	0.683
nicotinamide	-1.07	0.818	0.579	-1.31	0.351	0.223	-1.23	0.272	0.543
nonadecanoate (19:0)	-1.5	0.073	0.159	-1.78	0.008	0.03	-1.19	0.49	0.676
octadecanedioate	-1.02	0.949	0.614	-1.58	0.259	0.186	-1.55	0.21	0.542
octanoylcarnitine	-1.76	0.06	0.15	-2.48	0.013	0.034	-1.41	0.266	0.543
oleate (18:1n9)	-2.07	0.03	0.12	-3.67	0.001	0.01	-1.77	0.013	0.452
oleoylcarnitine	-1.35	0.098	0.187	-1.83	0.045	0.072	-1.35	0.26	0.543
ornithine	1.28	0.224	0.279	-1.04	0.903	0.419	-1.33	0.326	0.582
palmitate (16:0)	-1.55	0.002	0.039	-2.01	0.001	0.007	-1.29	0.092	0.533
palmitate, methyl ester	1.21	0.406	0.405	-1.11	0.662	0.346	-1.34	0.082	0.531
palmitoleate (16:1n7)	-2.09	0.023	0.108	-2.36	0.012	0.033	-1.13	0.518	0.688
palmitoyl sphingomyelin	-1.13	0.407	0.406	-1.18	0.272	0.191	-1.05	0.776	0.767
pantothenate	-1.03	0.878	0.596	1.06	0.758	0.377	1.09	0.629	0.728
p-cresol sulfate	1.98	0.064	0.153	1.89	0.205	0.163	-1.05	0.922	0.797
pelargonate (9:0)	-1.27	0.256	0.301	-1.34	0.155	0.141	-1.05	0.84	0.781
pentadecanoate (15:0)	-1.28	0.319	0.349	-1.52	0.108	0.114	-1.19	0.204	0.542
phenol sulfate	1.48	0.103	0.192	-1.41	0.31	0.205	-2.09	0.023	0.488
phenylacetylglutamine	1.87	0.047	0.139	2.35	0.041	0.069	1.25	0.597	0.717
phenylalanine	1.05	0.694	0.538	-1.04	0.743	0.373	-1.09	0.537	0.695
phenylalanylarginine	-1.77	0.035	0.125	-1.98	0.012	0.033	-1.12	0.481	0.672
phenylalanylglutamate	2.1	0.104	0.193	1.3	0.38	0.235	-1.62	0.332	0.585
phenylalanylphenylalanine	1.88	0.15	0.23	1.09	0.746	0.373	-1.72	0.235	0.542
phosphate	-1.28	0.008	0.066	-1.28	0.007	0.028	-1	0.952	0.802
pregn steroid monosulfate*	-1.77	0.072	0.159	-2.7	0.024	0.049	-1.53	0.187	0.541
pregnen-diol disulfate*	-1.03	0.896	0.601	-1.74	0.219	0.169	-1.69	0.227	0.542
proline	1.04	0.813	0.577	-1.19	0.313	0.206	-1.24	0.149	0.539
propionylcarnitine	1.35	0.383	0.391	1.55	0.222	0.169	1.15	0.512	0.685
pseudouridine	1.3	0.201	0.262	1.69	0.009	0.031	1.29	0.126	0.537
pyridoxate	-1.23	0.652	0.523	1.27	0.602	0.325	1.56	0.031	0.504
pyroglutamine*	1.48	0.081	0.168	1.57	0.091	0.105	1.06	0.778	0.768
serine	-1.03	0.895	0.6	-1.33	0.107	0.113	-1.3	0.154	0.539
serotonin (5HT)	3.72	0.001	0.011	1.07	0.77	0.381	-3.48	0.001	0.031
serylleucine	-1.32	0.454	0.432	-2.01	0.05	0.076	-1.52	0.315	0.575
sphinganine	2.21	0.07	0.157	-1.16	0.741	0.372	-2.56	0.065	0.526
sphingosine	2.56	0.047	0.139	-1.1	0.854	0.406	-2.81	0.045	0.516
stearamide	1.22	0.389	0.395	1.29	0.384	0.237	1.06	0.86	0.785
stearate (18:0)	-1.33	0.054	0.145	-1.74	0.003	0.02	-1.31	0.148	0.539
stearidonate (18:4n3)	-2.1	0.06	0.15	-3.38	0.007	0.029	-1.61	0.039	0.512
stearoyl sphingomyelin	1.12	0.619	0.51	-1.27	0.266	0.189	-1.42	0.1	0.534
stearoylcarnitine	-1.54	0.117	0.205	-2.14	0.034	0.062	-1.38	0.209	0.542
succinate	1.46	0.084	0.172	1.01	0.979	0.439	-1.45	0.092	0.533
taurocholate	14.8	0.001	0.014	16.88	0.001	0.005	1.14	0.823	0.778
taurocholenate sulfate*	1.19	0.771	0.564	1.23	0.627	0.334	1.04	0.948	0.801
taurodeoxycholate	10.17	0.001	0.032	8.44	0.013	0.034	-1.21	0.783	0.769
tetradecanedioate	-1.26	0.504	0.458	-1.12	0.722	0.366	1.12	0.655	0.736
threonate	1.22	0.569	0.488	1.2	0.504	0.287	-1.02	0.948	0.801
threonine	-1.22	0.2	0.262	-1.63	0.01	0.031	-1.34	0.119	0.536
trans-4-hydroxyproline	1.02	0.956	0.616	-1.12	0.702	0.359	-1.14	0.433	0.648
tryptophan	1.05	0.675	0.531	-1.26	0.198	0.161	-1.32	0.071	0.528
tryptophan betaine	-2.19	0.293	0.33	-4.61	0.006	0.027	-2.11	0.338	0.59
tryptophylglutamate	2.29	0.054	0.145	1.37	0.397	0.243	-1.67	0.305	0.568
tyrosine	1.22	0.064	0.153	1.05	0.707	0.361	-1.17	0.173	0.54
undecanoate (11:0)	1.11	0.374	0.386	1.08	0.588	0.32	-1.02	0.891	0.791
urate	-1.02	0.911	0.605	1.15	0.323	0.21	1.17	0.346	0.595
urea	-1.11	0.536	0.474	-1.14	0.548	0.305	-1.03	0.896	0.792
uridine	-1.21	0.223	0.279	-1.23	0.187	0.156	-1.02	0.885	0.79
urobilinogen	2.41	0.02	0.102	1.42	0.314	0.207	-1.7	0.079	0.53
valine	-1.08	0.477	0.445	-1.18	0.147	0.137	-1.1	0.255	0.543
XHWESASXXR*	-8.58	0.108	0.197	-17.53	0.021	0.046	-2.04	0.502	0.681
